# Supplementary material
Source: publisher site journal article supplement (https://www.dovepress.com/article/266546)
Supplement: Supplementary file 1 [file get_supplementary_file.php]

Table S1

Post-hoc comparison of colonoscopy-related search volume generated from Google Ads for seven countries. Number of searches express as 1,000 Google users-years.

A) Total number of searches

|         | Australia | Canada | Ireland | NZ  | Poland | UK |
|---------|-----------|--------|---------|-----|--------|----|
| Canada  | ***       |        |         |     |        |    |
| Ireland | ***       | ***    |         |     |        |    |
| NZ      | ***       | ***    | NS      |     |        |    |
| Poland  | NS        | ***    | ***     | *** |        |    |
| UK      | ***       | ***    | ***     | *** | ***    |    |
| USA     | ***       | ***    | ***     | *** | ***    | *  |

NS – non significant; NZ – New Zealand; UK – the United Kingdom; US – the United States; \*  $p < 0.05$ ; \*\*  $p < 0.01$ ; \*\*\*  $p < 0.001$

B) Category: patients features

|         | Australia | Canada | Ireland | NZ  | Poland | UK |
|---------|-----------|--------|---------|-----|--------|----|
| Canada  | **        |        |         |     |        |    |
| Ireland | *         | ***    |         |     |        |    |
| NZ      | NS        | ***    | NS      |     |        |    |
| Poland  | NS        | NS     | *       | *   |        |    |
| UK      | ***       | ***    | ***     | *** | *      |    |
| USA     | ***       | *      | ***     | *** | NS     | NS |

NS – non significant; NZ – New Zealand; UK – the United Kingdom; US – the United States; \*  $p < 0.05$ ; \*\*  $p < 0.01$ ; \*\*\*  $p < 0.001$

C) Category: indications

|         | Australia | Canada | Ireland | NZ  | Poland | UK |
|---------|-----------|--------|---------|-----|--------|----|
| Canada  | ***       |        |         |     |        |    |
| Ireland | ***       | ***    |         |     |        |    |
| NZ      | ***       | ***    | NS      |     |        |    |
| Poland  | NS        | NS     | NS      | NS  |        |    |
| UK      | ***       | *      | ***     | *** | NS     |    |
| USA     | ***       | NS     | ***     | *** | NS     | NS |

NS – non significant; NZ – New Zealand; UK – the United Kingdom; US – the United States; \*  $p < 0.05$ ; \*\*  $p < 0.01$ ; \*\*\*  $p < 0.001$

0.05; \*\*  $p < 0.01$ ; \*\*\*  $p < 0.001$

D) Category: preparation

|         | Australia | Canada | Ireland | NZ  | Poland | UK |
|---------|-----------|--------|---------|-----|--------|----|
| Canada  | **        |        |         |     |        |    |
| Ireland | NS        | **     |         |     |        |    |
| NZ      | NS        | ***    | NS      |     |        |    |
| Poland  | *         | NS     | **      | *** |        |    |
| UK      | **        | NS     | **      | **  | NS     |    |
| USA     | **        | NS     | *       | **  | NS     | NS |

NS – non significant; NZ – New Zealand; UK – the United Kingdom; US – the United States; \*  $p < 0.05$ ; \*\*  $p < 0.01$ ; \*\*\*  $p < 0.001$

E) Category: anesthesia

|         | Australia | Canada | Ireland | NZ | Poland | UK |
|---------|-----------|--------|---------|----|--------|----|
| Canada  | NS        |        |         |    |        |    |
| Ireland | NS        | NS     |         |    |        |    |
| NZ      | NS        | NS     | NS      |    |        |    |
| Poland  | NS        | NS     | NS      | NS |        |    |
| UK      | NS        | NS     | NS      | NS | NS     |    |
| USA     | NS        | NS     | *       | NS | NS     | NS |

NS – non significant; NZ – New Zealand; UK – the United Kingdom; US – the United States; \*  $p < 0.05$ ; \*\*  $p < 0.01$ ; \*\*\*  $p < 0.001$

F) Category: colonoscopy findings

|         | Australia | Canada | Ireland | NZ  | Poland | UK |
|---------|-----------|--------|---------|-----|--------|----|
| Canada  | ***       |        |         |     |        |    |
| Ireland | ***       | ***    |         |     |        |    |
| NZ      | ***       | ***    | NS      |     |        |    |
| Poland  | NS        | NS     | NS      | NS  |        |    |
| UK      | ***       | *      | ***     | *** | NS     |    |
| USA     | ***       | NS     | ***     | *** | NS     | NS |

NS – non significant; NZ – New Zealand; UK – the United Kingdom; US – the United States; \*  $p < 0.05$ ; \*\*  $p < 0.01$ ; \*\*\*  $p < 0.001$

G) Category: complications

|         | Australia | Canada | Ireland | NZ  | Poland | UK |
|---------|-----------|--------|---------|-----|--------|----|
| Canada  | **        |        |         |     |        |    |
| Ireland | ***       | ***    |         |     |        |    |
| NZ      | **        | ***    | NS      |     |        |    |
| Poland  | NS        | NS     | NS      | NS  |        |    |
| UK      | ***       | **     | ***     | *** | NS     |    |
| USA     | **        | *      | ***     | NS  | NS     | NS |

NS – non significant; NZ – New Zealand; UK – the United Kingdom; US – the United States; \*  $p < 0.05$ ; \*\*  $p < 0.01$ ; \*\*\*  $p < 0.001$

H) Category: screening programm

|         | Australia | Canada | Ireland | NZ  | Poland | UK |
|---------|-----------|--------|---------|-----|--------|----|
| Canada  | NS        |        |         |     |        |    |
| Ireland | **        | ***    |         |     |        |    |
| NZ      | **        | ***    | NS      |     |        |    |
| Poland  | NS        | NS     | NS      | NS  |        |    |
| UK      | *         | **     | ***     | *** | ***    |    |
| USA     | **        | *      | ***     | *** | ***    | NS |

NS – non significant; NZ – New Zealand; UK – the United Kingdom; US – the United States; \*  $p < 0.05$ ; \*\*  $p < 0.01$ ; \*\*\*  $p < 0.001$

I) Category: costs

|         | Australia | Canada | Ireland | NZ | Poland | UK |
|---------|-----------|--------|---------|----|--------|----|
| Canada  | NS        |        |         |    |        |    |
| Ireland | NS        | **     |         |    |        |    |
| NZ      | NS        | *      | NS      |    |        |    |
| Poland  | NS        | **     | NS      | NS |        |    |
| UK      | NS        | NS     | *       | *  | **     |    |
| USA     | NS        | NS     | NS      | NS | NS     | NS |

NS – non significant; NZ – New Zealand; UK – the United Kingdom; US – the United States; \*  $p < 0.05$ ; \*\*  $p < 0.01$ ; \*\*\*  $p < 0.001$

J) Category: searching facility

|         | Australia | Canada | Ireland | NZ | Poland | UK |
|---------|-----------|--------|---------|----|--------|----|
| Canada  | NS        |        |         |    |        |    |
| Ireland | NS        | **     |         |    |        |    |
| NZ      | NS        | **     | NS      |    |        |    |
| Poland  | NS        | *      | NS      | NS |        |    |
| UK      | NS        | NS     | **      | ** | **     |    |
| USA     | NS        | NS     | **      | ** | **     | NS |

NS – non significant; NZ – New Zealand; UK – the United Kingdom; US – the United States; \*  $p < 0.05$ ; \*\*  $p < 0.01$ ; \*\*\*  $p < 0.001$

K) Category: different colonoscopy techniques

|         | Australia | Canada | Ireland | NZ  | Poland | UK |
|---------|-----------|--------|---------|-----|--------|----|
| Canada  | ***       |        |         |     |        |    |
| Ireland | ***       | ***    |         |     |        |    |
| NZ      | ***       | ***    | NS      |     |        |    |
| Poland  | NS        | NS     | *       | NS  |        |    |
| UK      | ***       | **     | ***     | *** | **     |    |
| USA     | ***       | *      | ***     | *** | **     | NS |

NS – non significant; NZ – New Zealand; UK – the United Kingdom; US – the United States; \*  $p < 0.05$ ; \*\*  $p < 0.01$ ; \*\*\*  $p < 0.001$

L) Category: non-invasive alternative

|         | Australia | Canada | Ireland | NZ | Poland | UK |
|---------|-----------|--------|---------|----|--------|----|
| Canada  | NS        |        |         |    |        |    |
| Ireland | NS        | *      |         |    |        |    |
| NZ      | NS        | NS     | NS      |    |        |    |
| Poland  | NS        | NS     | NS      | NS |        |    |
| UK      | NS        | NS     | *       | *  | NS     |    |
| USA     | NS        | NS     | *       | NS | NS     | NS |

NS – non significant; NZ – New Zealand; UK – the United Kingdom; US – the United States; \*  $p < 0.05$ ; \*\*  $p < 0.01$ ; \*\*\*  $p < 0.001$

M) Category: virtual colonoscopy

|         | Australia | Canada | Ireland | NZ | Poland | UK |
|---------|-----------|--------|---------|----|--------|----|
| Canada  | NS        |        |         |    |        |    |
| Ireland | NS        | NS     |         |    |        |    |
| NZ      | NS        | NS     | NS      |    |        |    |
| Poland  | NS        | NS     | NS      | NS |        |    |
| UK      | NS        | NS     | NS      | NS | NS     |    |
| USA     | NS        | NS     | NS      | NS | NS     | NS |

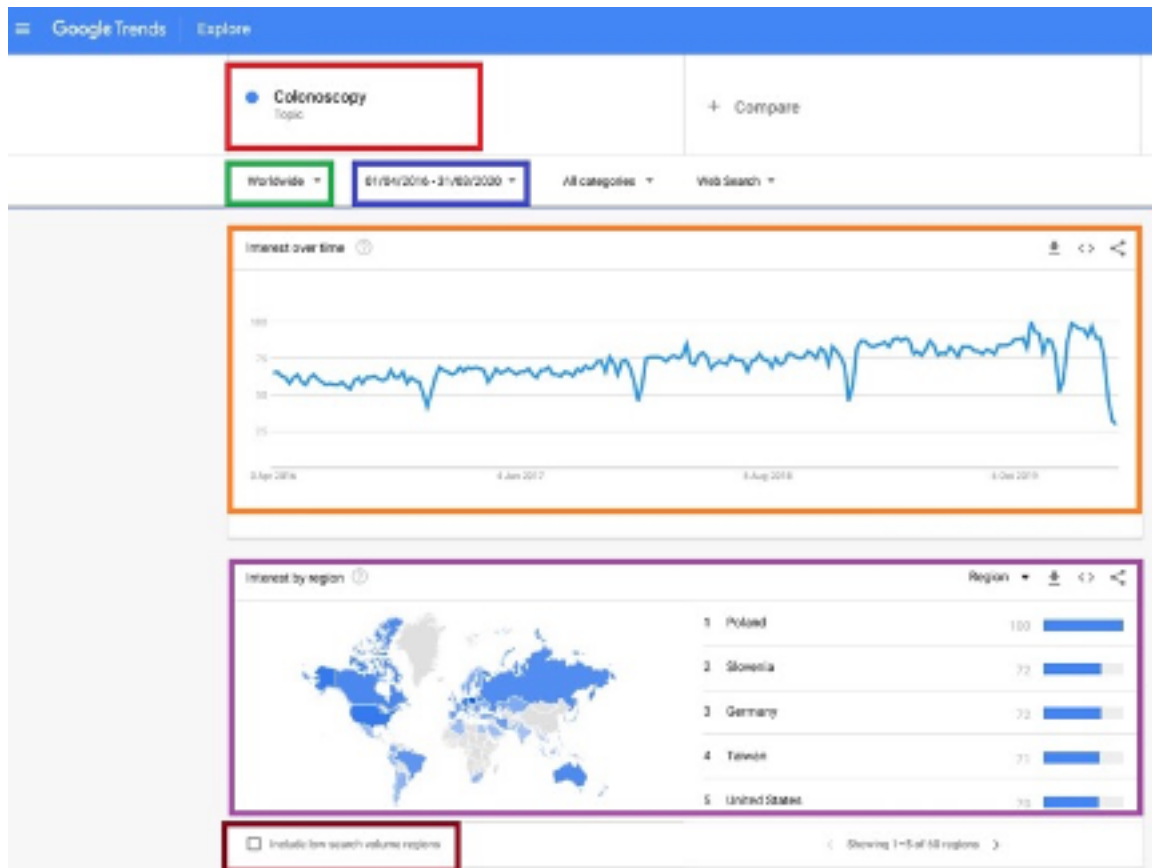

Supplementary Figure 1.

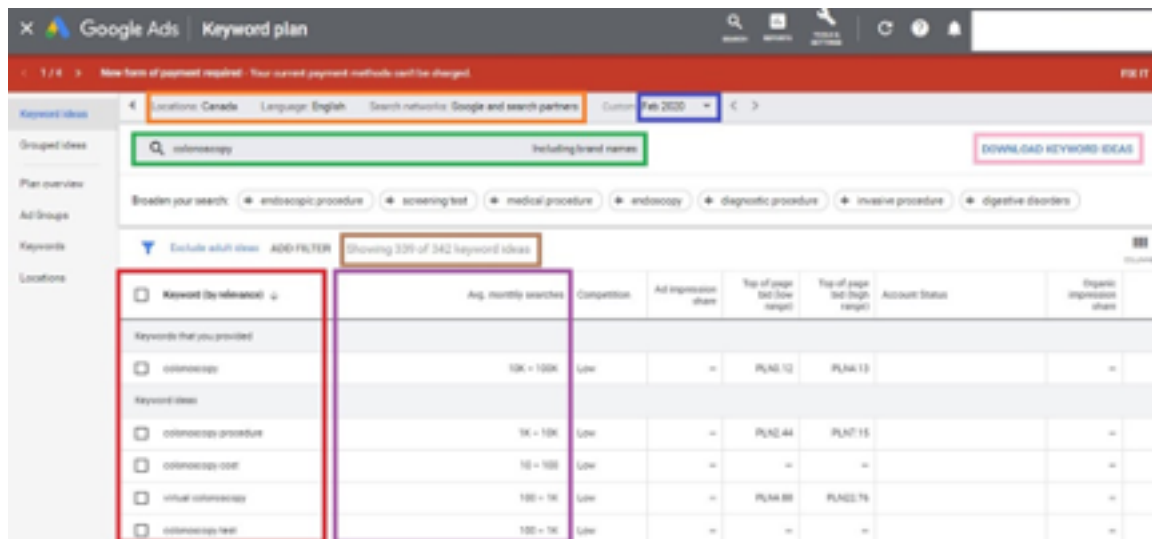

Supplementary Figure 2.

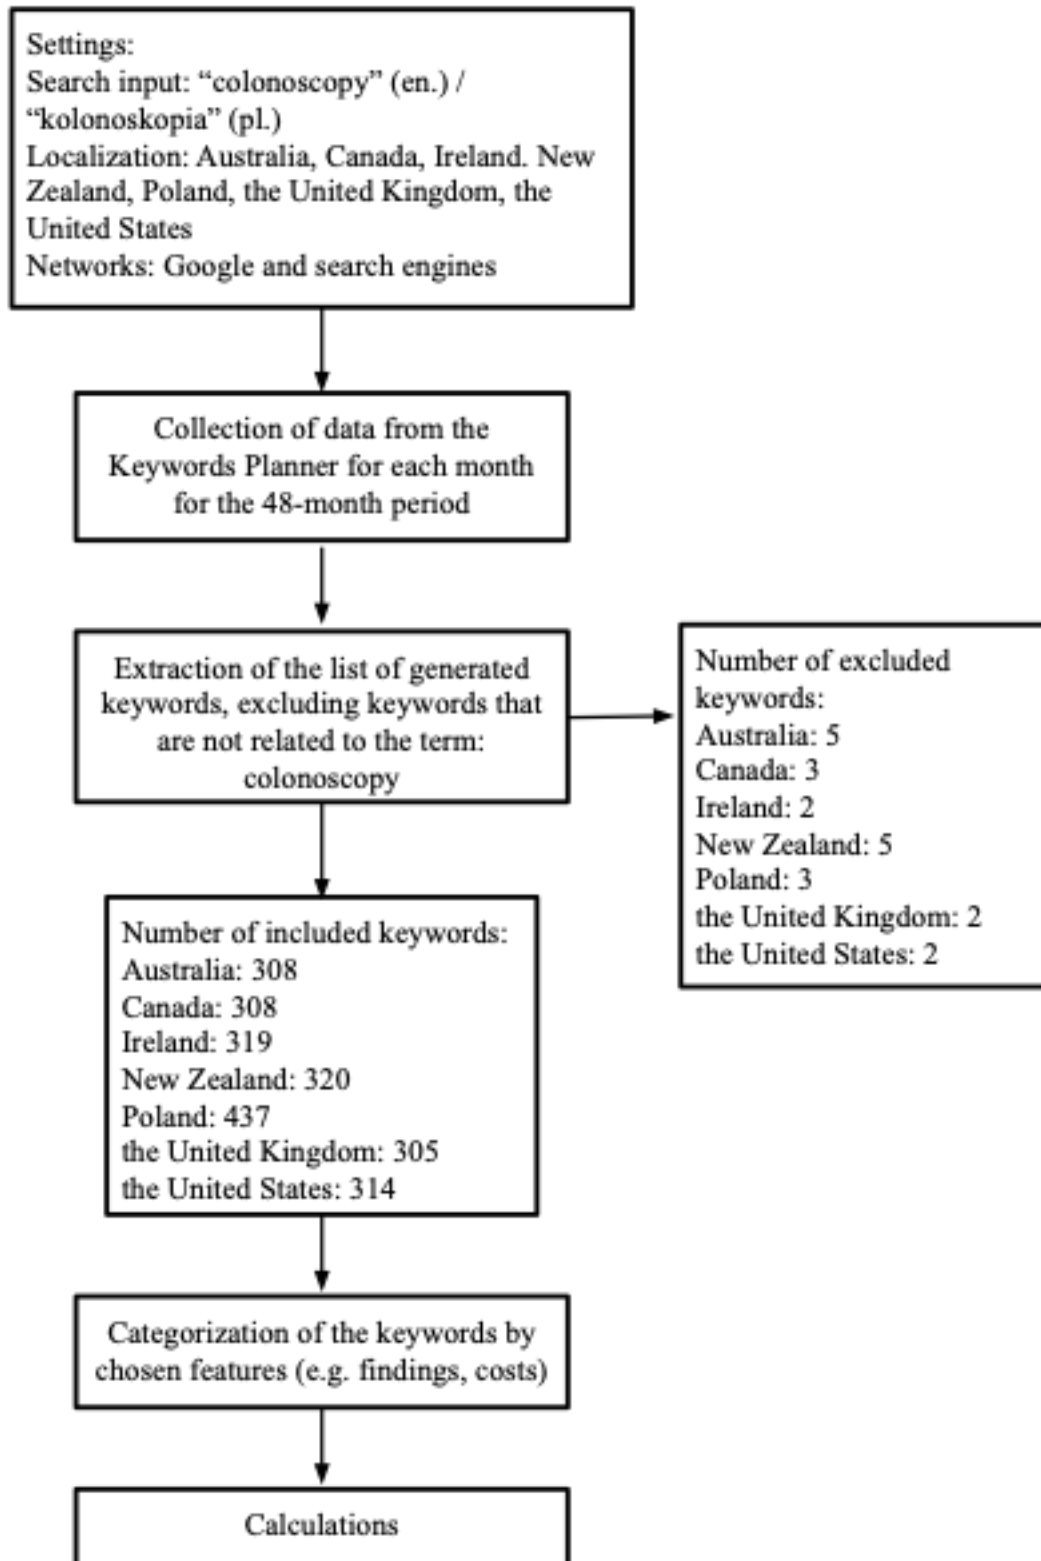

**Supplementary Figure 3.**

**Legends**



**Figure S1.** Screenshot of the Google Trends search engine.

The red frame encapsulates the search bar: here, the search input is a topic "Colonoscopy"; green frame – control for the setting of the geographical region of the search; blue frame – control for setting timeframe; orange frame – graphics of interest over time of the input and share options (download arrow icon for downloading .csv file); violet frame – visualization of interest by region and share options (download arrow icon for downloading .csv file); brown frame – Google Trends options to include or exclude countries with low search volume.

**Figure S2.** Screenshot of the keyword search engine of Google Ads Keywords Planner.

The blue frame encapsulates the control for setting the period of the search; brown frame—total number of related keywords found ("keyword ideas"); green frame—search bar for user-entered search terms; orange frame—control for setting the language and geographical region of the search, as well as the search network; pink frame—button for downloading a .csv file of the search results; red frame—the long list of keywords; violet frame—monthly search volume for each keyword

**Figure S3.** Flow chart of the data collection and manipulation workflow
